# Supplementary material
Source: PubMed Central journal article supplement (PMC9149100)
Supplement: NIHMS1793262-supplement-Supplementary_Table_S1.pdf [file NIHMS1793262-supplement-Supplementary_Table_S1.pdf]

**Supplementary Table S1: Genomic alterations in components of the CDK4/6 pathway.** All data were compiled from The Cancer Genome Atlas (TCGA) in August 2021. Only studies with 10 or more samples and frequencies above 5% are shown.

| Alteration type                   | Cancer type                                                      | Frequency of alteration |        |
|-----------------------------------|------------------------------------------------------------------|-------------------------|--------|
| <b>CCND1</b>                      |                                                                  |                         |        |
| <b>CNV gain</b>                   |                                                                  |                         |        |
|                                   | Esophageal carcinoma                                             | 72 / 184                | 39.13% |
|                                   | Head and Neck squamous cell carcinoma                            | 174 / 521               | 33.40% |
|                                   | Breast invasive carcinoma                                        | 301 / 1072              | 28.08% |
|                                   | Bladder Urothelial Carcinoma                                     | 101 / 408               | 24.75% |
|                                   | Ovarian serous cystadenocarcinoma                                | 139 / 585               | 23.76% |
|                                   | Lung squamous cell carcinoma                                     | 113 / 502               | 22.51% |
|                                   | Uterine Carcinosarcoma                                           | 8 / 56                  | 14.29% |
|                                   | Stomach adenocarcinoma                                           | 55 / 432                | 12.73% |
|                                   | Skin Cutaneous Melanoma                                          | 57 / 468                | 12.18% |
|                                   | Sarcoma                                                          | 31 / 260                | 11.92% |
|                                   | Cervical squamous cell carcinoma and endocervical adenocarcinoma | 35 / 294                | 11.90% |
|                                   | Lung adenocarcinoma                                              | 57 / 513                | 11.11% |
|                                   | Liver hepatocellular carcinoma                                   | 39 / 371                | 10.51% |
|                                   | Uterine Corpus Endometrial Carcinoma                             | 41 / 510                | 8.04%  |
| <b>CNV loss</b>                   |                                                                  |                         |        |
|                                   | Uterine Carcinosarcoma                                           | 3 / 56                  | 5.36%  |
| <b>3' UTR insertion/deletion</b>  |                                                                  |                         |        |
|                                   | Uterine Carcinosarcoma                                           | 8 / 105                 | 7.62%  |
| <b>3' UTR substitution</b>        |                                                                  |                         |        |
|                                   | Uterine Carcinosarcoma                                           | 10 / 105                | 9.52%  |
|                                   | Cervical squamous cell carcinoma and endocervical adenocarcinoma | 2 / 39                  | 5.13%  |
| <b>Inframe insertion/deletion</b> |                                                                  |                         |        |
|                                   | Uterine Carcinosarcoma                                           | 14 / 105                | 13.33% |
| <b>Missense substitution</b>      |                                                                  |                         |        |
|                                   | Brain Lower Grade Glioma                                         | 4 / 12                  | 33.33% |
|                                   | Uterine Carcinosarcoma                                           | 30 / 105                | 28.57% |
|                                   | Colon adenocarcinoma                                             | 3 / 12                  | 25.00% |
|                                   | Uterine Carcinosarcoma                                           | 1 / 12                  | 8.33%  |
|                                   | Cervical squamous cell carcinoma and endocervical adenocarcinoma | 2 / 39                  | 5.13%  |
| <b>Stop codon gain</b>            |                                                                  |                         |        |
|                                   | Colon adenocarcinoma                                             | 1 / 12                  | 8.33%  |
| <b>CCND2</b>                      |                                                                  |                         |        |
| <b>CNV gain</b>                   |                                                                  |                         |        |
|                                   | Ovarian serous cystadenocarcinoma                                | 130 / 585               | 22.22% |
|                                   | Uterine Carcinosarcoma                                           | 9 / 56                  | 16.07% |
|                                   | Lung squamous cell carcinoma                                     | 56 / 502                | 11.16% |
|                                   | Head and Neck squamous cell carcinoma                            | 37 / 521                | 7.10%  |
|                                   | Esophageal carcinoma                                             | 13 / 184                | 7.07%  |
|                                   | Breast invasive carcinoma                                        | 67 / 1,072              | 6.25%  |

|                                  |                                                                  |          |        |
|----------------------------------|------------------------------------------------------------------|----------|--------|
|                                  | Sarcoma                                                          | 16 / 260 | 6.15%  |
|                                  | Bladder Urothelial Carcinoma                                     | 24 / 408 | 5.88%  |
|                                  | Colon adenocarcinoma                                             | 23 / 448 | 5.13%  |
| <b>CNV loss</b>                  |                                                                  |          |        |
|                                  | Sarcoma                                                          | 26 / 260 | 10.00% |
|                                  | Lymphoid Neoplasm Diffuse Large B-cell Lymphoma                  | 4 / 47   | 8.51%  |
|                                  | Ovarian serous cystadenocarcinoma                                | 40 / 585 | 6.84%  |
|                                  | Stomach adenocarcinoma                                           | 27 / 432 | 6.25%  |
|                                  | Lung adenocarcinoma                                              | 30 / 513 | 5.85%  |
|                                  | Pancreatic adenocarcinoma                                        | 9 / 175  | 5.14%  |
| <b>3' UTR insertion/deletion</b> |                                                                  |          |        |
|                                  | Uterine Corpus Endometrial Carcinoma                             | 76 / 126 | 60.32% |
|                                  | Cervical squamous cell carcinoma and endocervical adenocarcinoma | 5 / 22   | 22.73% |
|                                  | Esophageal carcinoma                                             | 6 / 28   | 21.43% |
|                                  | Sarcoma                                                          | 6 / 44   | 13.64% |
| <b>3' UTR substitution</b>       |                                                                  |          |        |
|                                  | Uterine Corpus Endometrial Carcinoma                             | 71 / 126 | 56.35% |
|                                  | Cervical squamous cell carcinoma and endocervical adenocarcinoma | 8 / 22   | 36.36% |
|                                  | Esophageal carcinoma                                             | 6 / 28   | 21.43% |
|                                  | Sarcoma                                                          | 3 / 44   | 6.82%  |
|                                  | Breast invasive carcinoma                                        | 6 / 117  | 5.13%  |
| <b>Frameshift mutation</b>       |                                                                  |          |        |
|                                  | Prostate adenocarcinoma                                          | 1 / 12   | 8.33%  |
| <b>Missense substitution</b>     |                                                                  |          |        |
|                                  | Skin Cutaneous Melanoma                                          | 7 / 37   | 18.92% |
|                                  | Uterine Corpus Endometrial Carcinoma                             | 20 / 126 | 15.87% |
|                                  | Liver hepatocellular carcinoma                                   | 3 / 22   | 13.64% |
|                                  | Pancreatic adenocarcinoma                                        | 1 / 11   | 9.09%  |
|                                  | Uterine Carcinosarcoma                                           | 1 / 12   | 8.33%  |
|                                  | Stomach adenocarcinoma                                           | 4 / 52   | 7.69%  |

## **CCND3**

### **CNV gain**

|  |                                                 |            |        |
|--|-------------------------------------------------|------------|--------|
|  | Ovarian serous cystadenocarcinoma               | 93 / 585   | 15.90% |
|  | Esophageal carcinoma                            | 28 / 184   | 15.22% |
|  | Stomach adenocarcinoma                          | 54 / 432   | 12.50% |
|  | Lung adenocarcinoma                             | 44 / 513   | 8.58%  |
|  | Bladder Urothelial Carcinoma                    | 32 / 408   | 7.84%  |
|  | Pancreatic adenocarcinoma                       | 13 / 175   | 7.43%  |
|  | Lung squamous cell carcinoma                    | 37 / 502   | 7.37%  |
|  | Breast invasive carcinoma                       | 77 / 1,072 | 7.18%  |
|  | Lymphoid Neoplasm Diffuse Large B-cell Lymphoma | 3 / 47     | 6.38%  |
|  | Rectum adenocarcinoma                           | 10 / 164   | 6.10%  |

### **CNV loss**

|  |                                   |          |       |
|--|-----------------------------------|----------|-------|
|  | Ovarian serous cystadenocarcinoma | 33 / 585 | 5.64% |
|--|-----------------------------------|----------|-------|

### **3' UTR insertion/deletion**

|                              |                                      |         |        |
|------------------------------|--------------------------------------|---------|--------|
|                              | Uterine Corpus Endometrial Carcinoma | 12 / 56 | 21.43% |
| <b>3' UTR substitution</b>   |                                      |         |        |
|                              | Uterine Corpus Endometrial Carcinoma | 8 / 56  | 14.29% |
|                              | Esophageal carcinoma                 | 3 / 33  | 9.09%  |
|                              | Liver hepatocellular carcinoma       | 1 / 18  | 5.56%  |
| <b>Missense substitution</b> |                                      |         |        |
|                              | Colon adenocarcinoma                 | 4 / 17  | 23.53% |
|                              | Uterine Corpus Endometrial Carcinoma | 7 / 56  | 12.50% |
|                              | Rectum adenocarcinoma                | 1 / 10  | 10.00% |
|                              | Bladder Urothelial Carcinoma         | 5 / 52  | 9.62%  |
|                              | Pancreatic adenocarcinoma            | 1 / 14  | 7.14%  |
|                              | Skin Cutaneous Melanoma              | 2 / 30  | 6.67%  |

### CDK4

#### CNV gain

|  |                                   |          |        |
|--|-----------------------------------|----------|--------|
|  | Sarcoma                           | 56 / 260 | 21.54% |
|  | Glioblastoma multiforme           | 98 / 596 | 16.44% |
|  | Lung adenocarcinoma               | 61 / 513 | 11.89% |
|  | Ovarian serous cystadenocarcinoma | 53 / 585 | 9.06%  |
|  | Stomach adenocarcinoma            | 31 / 432 | 7.18%  |
|  | Skin Cutaneous Melanoma           | 28 / 468 | 5.98%  |
|  | Brain Lower Grade Glioma          | 27 / 497 | 5.43%  |

#### CNV loss

|  |                                   |          |       |
|--|-----------------------------------|----------|-------|
|  | Ovarian serous cystadenocarcinoma | 35 / 585 | 5.98% |
|  | Sarcoma                           | 14 / 260 | 5.38% |

#### 5' UTR substitution

|  |                                                                  |        |       |
|--|------------------------------------------------------------------|--------|-------|
|  | Cervical squamous cell carcinoma and endocervical adenocarcinoma | 1 / 13 | 7.69% |
|--|------------------------------------------------------------------|--------|-------|

#### Missense substitution

|  |                                                                  |         |        |
|--|------------------------------------------------------------------|---------|--------|
|  | Uterine Corpus Endometrial Carcinoma                             | 11 / 33 | 33.33% |
|  | Cervical squamous cell carcinoma and endocervical adenocarcinoma | 3 / 13  | 23.08% |
|  | Skin Cutaneous Melanoma                                          | 10 / 45 | 22.22% |
|  | Head and Neck squamous cell carcinoma                            | 3 / 26  | 11.54% |
|  | Colon adenocarcinoma                                             | 1 / 10  | 10.00% |
|  | Bladder Urothelial Carcinoma                                     | 2 / 30  | 6.67%  |
|  | Stomach adenocarcinoma                                           | 2 / 40  | 5.00%  |

### CDK6

#### CNV gain

|  |                                   |          |        |
|--|-----------------------------------|----------|--------|
|  | Esophageal carcinoma              | 39 / 184 | 21.20% |
|  | Ovarian serous cystadenocarcinoma | 67 / 585 | 11.45% |
|  | Stomach adenocarcinoma            | 48 / 432 | 11.11% |
|  | Lung squamous cell carcinoma      | 55 / 502 | 10.96% |
|  | Sarcoma                           | 19 / 260 | 7.31%  |
|  | Uterine Carcinosarcoma            | 3 / 56   | 5.36%  |
|  | Pancreatic adenocarcinoma         | 9 / 175  | 5.14%  |
|  | Liver hepatocellular carcinoma    | 19 / 371 | 5.12%  |

#### CNV loss

|                              |                                                                  |           |        |
|------------------------------|------------------------------------------------------------------|-----------|--------|
|                              | Uterine Carcinosarcoma                                           | 3 / 56    | 5.36%  |
| <b>3' UTR substitution</b>   |                                                                  |           |        |
|                              | Uterine Corpus Endometrial Carcinoma                             | 25 / 64   | 39.06% |
|                              | Cervical squamous cell carcinoma and endocervical adenocarcinoma | 8 / 24    | 33.33% |
|                              | Esophageal carcinoma                                             | 3 / 47    | 6.38%  |
| <b>Missense substitution</b> |                                                                  |           |        |
|                              | Uterine Corpus Endometrial Carcinoma                             | 18 / 64   | 28.13% |
|                              | Pancreatic adenocarcinoma                                        | 2 / 10    | 20.00% |
|                              | Bladder Urothelial Carcinoma                                     | 5 / 30    | 16.67% |
|                              | Colon adenocarcinoma                                             | 3 / 21    | 14.29% |
|                              | Lung adenocarcinoma                                              | 5 / 36    | 13.89% |
|                              | Glioblastoma multiforme                                          | 2 / 18    | 11.11% |
|                              | Stomach adenocarcinoma                                           | 5 / 59    | 8.47%  |
|                              | Skin Cutaneous Melanoma                                          | 2 / 26    | 7.69%  |
| <b>CDKN2A</b>                |                                                                  |           |        |
| <b>CNV gain</b>              |                                                                  |           |        |
|                              | Ovarian serous cystadenocarcinoma                                | 46 / 585  | 7.86%  |
| <b>CNV loss</b>              |                                                                  |           |        |
|                              | Glioblastoma multiforme                                          | 377 / 596 | 63.26% |
|                              | Esophageal carcinoma                                             | 89 / 184  | 48.37% |
|                              | Bladder Urothelial Carcinoma                                     | 152 / 408 | 37.25% |
|                              | Skin Cutaneous Melanoma                                          | 164 / 468 | 35.04% |
|                              | Head and Neck squamous cell carcinoma                            | 181 / 521 | 34.74% |
|                              | Pancreatic adenocarcinoma                                        | 60 / 175  | 34.29% |
|                              | Lung squamous cell carcinoma                                     | 148 / 502 | 29.48% |
|                              | Cholangiocarcinoma                                               | 8 / 36    | 22.22% |
|                              | Lung adenocarcinoma                                              | 104 / 513 | 20.27% |
|                              | Sarcoma                                                          | 48 / 260  | 18.46% |
|                              | Brain Lower Grade Glioma                                         | 81 / 497  | 16.30% |
|                              | Stomach adenocarcinoma                                           | 66 / 432  | 15.28% |
|                              | Liver hepatocellular carcinoma                                   | 44 / 371  | 11.86% |
|                              | Adrenocortical carcinoma                                         | 10 / 90   | 11.11% |
|                              | Ovarian serous cystadenocarcinoma                                | 50 / 585  | 8.55%  |
|                              | Thymoma                                                          | 8 / 113   | 7.08%  |
|                              | Kidney renal papillary cell carcinoma                            | 15 / 269  | 5.58%  |
|                              | Uterine Carcinosarcoma                                           | 3 / 56    | 5.36%  |
| <b>3' UTR substitution</b>   |                                                                  |           |        |
|                              | Uterine Corpus Endometrial Carcinoma                             | 9 / 61    | 14.75% |
|                              | Colon adenocarcinoma                                             | 4 / 35    | 11.43% |
|                              | Cervical squamous cell carcinoma and endocervical adenocarcinoma | 1 / 18    | 5.56%  |
| <b>Frameshift mutation</b>   |                                                                  |           |        |
|                              | Pancreatic adenocarcinoma                                        | 11 / 89   | 12.36% |
|                              | Adrenocortical carcinoma                                         | 1 / 11    | 9.09%  |
|                              | Lung squamous cell carcinoma                                     | 19 / 236  | 8.05%  |
|                              | Head and Neck squamous cell carcinoma                            | 21 / 278  | 7.55%  |

|                              |                                                                  |           |        |
|------------------------------|------------------------------------------------------------------|-----------|--------|
|                              | Liver hepatocellular carcinoma                                   | 3 / 54    | 5.56%  |
| <b>Missense substitution</b> |                                                                  |           |        |
|                              | Cervical squamous cell carcinoma and endocervical adenocarcinoma | 6 / 18    | 33.33% |
|                              | Cholangiocarcinoma                                               | 2 / 10    | 20.00% |
|                              | Lung squamous cell carcinoma                                     | 34 / 236  | 14.41% |
|                              | Pancreatic adenocarcinoma                                        | 12 / 89   | 13.48% |
|                              | Uterine Corpus Endometrial Carcinoma                             | 8 / 61    | 13.11% |
|                              | Lung adenocarcinoma                                              | 19 / 145  | 13.10% |
|                              | Liver hepatocellular carcinoma                                   | 6 / 54    | 11.11% |
|                              | Stomach adenocarcinoma                                           | 10 / 96   | 10.42% |
|                              | Skin Cutaneous Melanoma                                          | 23 / 222  | 10.36% |
|                              | Bladder Urothelial Carcinoma                                     | 19 / 187  | 10.16% |
|                              | Head and Neck squamous cell carcinoma                            | 23 / 278  | 8.27%  |
|                              | Esophageal carcinoma                                             | 6 / 104   | 5.77%  |
| <b>Splice donor/acceptor</b> |                                                                  |           |        |
|                              | Cervical squamous cell carcinoma and endocervical adenocarcinoma | 1 / 18    | 5.56%  |
| <b>Stop codon gain</b>       |                                                                  |           |        |
|                              | Head and Neck squamous cell carcinoma                            | 59 / 278  | 21.22% |
|                              | Pancreatic adenocarcinoma                                        | 12 / 89   | 13.48% |
|                              | Skin Cutaneous Melanoma                                          | 24 / 222  | 10.81% |
|                              | Lung squamous cell carcinoma                                     | 23 / 236  | 9.75%  |
|                              | Kidney renal papillary cell carcinoma                            | 1 / 16    | 6.25%  |
|                              | Stomach adenocarcinoma                                           | 5 / 96    | 5.21%  |
|                              | Prostate adenocarcinoma                                          | 1 / 20    | 5.00%  |
| <b>CDKN2B</b>                |                                                                  |           |        |
| <b>CNV gain</b>              |                                                                  |           |        |
|                              | Ovarian serous cystadenocarcinoma                                | 46 / 585  | 7.86%  |
| <b>CNV loss</b>              |                                                                  |           |        |
|                              | Glioblastoma multiforme                                          | 372 / 596 | 62.42% |
|                              | Bladder Urothelial Carcinoma                                     | 150 / 408 | 36.76% |
|                              | Pancreatic adenocarcinoma                                        | 58 / 175  | 33.14% |
|                              | Skin Cutaneous Melanoma                                          | 155 / 468 | 33.12% |
|                              | Lung squamous cell carcinoma                                     | 144 / 502 | 28.69% |
|                              | Lung adenocarcinoma                                              | 99 / 513  | 19.30% |
|                              | Brain Lower Grade Glioma                                         | 79 / 497  | 15.90% |
|                              | Stomach adenocarcinoma                                           | 63 / 432  | 14.58% |
|                              | Liver hepatocellular carcinoma                                   | 41 / 371  | 11.05% |
|                              | Adrenocortical carcinoma                                         | 9 / 90    | 10.00% |
|                              | Ovarian serous cystadenocarcinoma                                | 49 / 585  | 8.38%  |
|                              | Kidney renal papillary cell carcinoma                            | 15 / 269  | 5.58%  |
|                              | Uterine Carcinosarcoma                                           | 3 / 56    | 5.36%  |
| <b>3' UTR substitution</b>   |                                                                  |           |        |
|                              | Colon adenocarcinoma                                             | 1 / 20    | 5.00%  |
| <b>5' UTR substitution</b>   |                                                                  |           |        |
|                              | Uterine Corpus Endometrial Carcinoma                             | 5 / 35    | 14.29% |

|                                  |                                                                  |          |        |
|----------------------------------|------------------------------------------------------------------|----------|--------|
|                                  | Adrenocortical carcinoma                                         | 1 / 11   | 9.09%  |
|                                  | Colon adenocarcinoma                                             | 1 / 20   | 5.00%  |
| <b>Missense substitution</b>     |                                                                  |          |        |
|                                  | Cervical squamous cell carcinoma and endocervical adenocarcinoma | 1 / 11   | 9.09%  |
|                                  | Uterine Corpus Endometrial Carcinoma                             | 3 / 35   | 8.57%  |
|                                  | Colon adenocarcinoma                                             | 1 / 20   | 5.00%  |
| <b>E2F1</b>                      |                                                                  |          |        |
| <b>CNV gain</b>                  |                                                                  |          |        |
|                                  | Ovarian serous cystadenocarcinoma                                | 75 / 585 | 12.82% |
|                                  | Uterine Carcinosarcoma                                           | 6 / 56   | 10.71% |
|                                  | Lung squamous cell carcinoma                                     | 45 / 502 | 8.96%  |
|                                  | Bladder Urothelial Carcinoma                                     | 36 / 408 | 8.82%  |
|                                  | Cervical squamous cell carcinoma and endocervical adenocarcinoma | 20 / 294 | 6.80%  |
|                                  | Colon adenocarcinoma                                             | 25 / 448 | 5.58%  |
|                                  | Esophageal carcinoma                                             | 10 / 184 | 5.43%  |
|                                  | Head and Neck squamous cell carcinoma                            | 27 / 521 | 5.18%  |
| <b>3' UTR insertion/deletion</b> |                                                                  |          |        |
|                                  | Esophageal carcinoma                                             | 1 / 12   | 8.33%  |
|                                  | Uterine Corpus Endometrial Carcinoma                             | 4 / 79   | 5.06%  |
| <b>3' UTR substitution</b>       |                                                                  |          |        |
|                                  | Uterine Corpus Endometrial Carcinoma                             | 9 / 79   | 11.39% |
|                                  | Cervical squamous cell carcinoma and endocervical adenocarcinoma | 2 / 25   | 8.00%  |
| <b>Frameshift mutation</b>       |                                                                  |          |        |
|                                  | Uterine Corpus Endometrial Carcinoma                             | 10 / 79  | 12.66% |
|                                  | Prostate adenocarcinoma                                          | 1 / 14   | 7.14%  |
| <b>Missense substitution</b>     |                                                                  |          |        |
|                                  | Skin Cutaneous Melanoma                                          | 6 / 19   | 31.58% |
|                                  | Uterine Corpus Endometrial Carcinoma                             | 23 / 79  | 29.11% |
|                                  | Liver hepatocellular carcinoma                                   | 3 / 15   | 20.00% |
|                                  | Stomach adenocarcinoma                                           | 3 / 27   | 11.11% |
|                                  | Esophageal carcinoma                                             | 1 / 12   | 8.33%  |
|                                  | Cervical squamous cell carcinoma and endocervical adenocarcinoma | 2 / 25   | 8.00%  |
|                                  | Lung adenocarcinoma                                              | 3 / 39   | 7.69%  |
|                                  | Prostate adenocarcinoma                                          | 1 / 14   | 7.14%  |
|                                  | Breast invasive carcinoma                                        | 5 / 79   | 6.33%  |
|                                  | Lung squamous cell carcinoma                                     | 3 / 58   | 5.17%  |
| <b>Stop codon gain</b>           |                                                                  |          |        |
|                                  | Uterine Corpus Endometrial Carcinoma                             | 5 / 79   | 6.33%  |
|                                  | Skin Cutaneous Melanoma                                          | 1 / 19   | 5.26%  |
| <b>RB1</b>                       |                                                                  |          |        |
| <b>CNV gain</b>                  |                                                                  |          |        |
|                                  | Ovarian serous cystadenocarcinoma                                | 40 / 585 | 6.84%  |
|                                  | Stomach adenocarcinoma                                           | 28 / 432 | 6.48%  |
| <b>CNV loss</b>                  |                                                                  |          |        |
|                                  | Sarcoma                                                          | 81 / 260 | 31.15% |

|                                                                  |             |        |
|------------------------------------------------------------------|-------------|--------|
| Prostate adenocarcinoma                                          | 133 / 487   | 27.31% |
| Uterine Carcinosarcoma                                           | 13 / 56     | 23.21% |
| Bladder Urothelial Carcinoma                                     | 91 / 408    | 22.30% |
| Ovarian serous cystadenocarcinoma                                | 123 / 585   | 21.03% |
| Liver hepatocellular carcinoma                                   | 78 / 371    | 21.02% |
| Cervical squamous cell carcinoma and endocervical adenocarcinoma | 56 / 294    | 19.05% |
| Glioblastoma multiforme                                          | 74 / 596    | 12.42% |
| Breast invasive carcinoma                                        | 125 / 1,072 | 11.66% |
| Lung squamous cell carcinoma                                     | 54 / 502    | 10.76% |
| Mesothelioma                                                     | 9 / 84      | 10.71% |
| Head and Neck squamous cell carcinoma                            | 55 / 521    | 10.56% |
| Rectum adenocarcinoma                                            | 17 / 164    | 10.37% |
| Esophageal carcinoma                                             | 16 / 184    | 8.70%  |
| Lung adenocarcinoma                                              | 37 / 513    | 7.21%  |
| Adrenocortical carcinoma                                         | 6 / 90      | 6.67%  |
| Brain Lower Grade Glioma                                         | 29 / 497    | 5.84%  |
| Colon adenocarcinoma                                             | 25 / 448    | 5.58%  |
| Stomach adenocarcinoma                                           | 23 / 432    | 5.32%  |
| <b>3' UTR substitution</b>                                       |             |        |
| Uterine Corpus Endometrial Carcinoma                             | 15 / 104    | 14.42% |
| <b>Frameshift mutation</b>                                       |             |        |
| Bladder Urothelial Carcinoma                                     | 22 / 140    | 15.71% |
| Uterine Corpus Endometrial Carcinoma                             | 15 / 104    | 14.42% |
| Glioblastoma multiforme                                          | 11 / 79     | 13.92% |
| Esophageal carcinoma                                             | 3 / 23      | 13.04% |
| Liver hepatocellular carcinoma                                   | 10 / 86     | 11.63% |
| Sarcoma                                                          | 11 / 96     | 11.46% |
| Lung adenocarcinoma                                              | 9 / 79      | 11.39% |
| Skin Cutaneous Melanoma                                          | 5 / 45      | 11.11% |
| Kidney renal clear cell carcinoma                                | 1 / 11      | 9.09%  |
| Cervical squamous cell carcinoma and endocervical adenocarcinoma | 6 / 71      | 8.45%  |
| Lung squamous cell carcinoma                                     | 8 / 95      | 8.42%  |
| Brain Lower Grade Glioma                                         | 3 / 36      | 8.33%  |
| Colon adenocarcinoma                                             | 4 / 49      | 8.16%  |
| Ovarian serous cystadenocarcinoma                                | 7 / 131     | 5.34%  |
| Head and Neck squamous cell carcinoma                            | 4 / 76      | 5.26%  |
| <b>Inframe insertion/deletion</b>                                |             |        |
| Uterine Carcinosarcoma                                           | 1 / 16      | 6.25%  |
| <b>Missense substitution</b>                                     |             |        |
| Uterine Corpus Endometrial Carcinoma                             | 59 / 104    | 56.73% |
| Colon adenocarcinoma                                             | 10 / 49     | 20.41% |
| Rectum adenocarcinoma                                            | 4 / 24      | 16.67% |
| Lung adenocarcinoma                                              | 10 / 79     | 12.66% |
| Stomach adenocarcinoma                                           | 8 / 65      | 12.31% |
| Skin Cutaneous Melanoma                                          | 5 / 45      | 11.11% |

|                                                                  |          |       |
|------------------------------------------------------------------|----------|-------|
| Cervical squamous cell carcinoma and endocervical adenocarcinoma | 7 / 71   | 9.86% |
| Kidney renal clear cell carcinoma                                | 1 / 11   | 9.09% |
| Glioblastoma multiforme                                          | 7 / 79   | 8.86% |
| Lung squamous cell carcinoma                                     | 8 / 95   | 8.42% |
| Head and Neck squamous cell carcinoma                            | 6 / 76   | 7.89% |
| Bladder Urothelial Carcinoma                                     | 11 / 140 | 7.86% |
| Uterine Carcinosarcoma                                           | 1 / 16   | 6.25% |
| Liver hepatocellular carcinoma                                   | 5 / 86   | 5.81% |

**Splice donor/acceptor**

|                                      |          |        |
|--------------------------------------|----------|--------|
| Bladder Urothelial Carcinoma         | 17 / 140 | 12.14% |
| Glioblastoma multiforme              | 8 / 79   | 10.13% |
| Lung adenocarcinoma                  | 7 / 79   | 8.86%  |
| Lung squamous cell carcinoma         | 8 / 95   | 8.42%  |
| Sarcoma                              | 7 / 96   | 7.29%  |
| Liver hepatocellular carcinoma       | 6 / 86   | 6.98%  |
| Skin Cutaneous Melanoma              | 3 / 45   | 6.67%  |
| Uterine Carcinosarcoma               | 1 / 16   | 6.25%  |
| Uterine Corpus Endometrial Carcinoma | 6 / 104  | 5.77%  |
| Brain Lower Grade Glioma             | 2 / 36   | 5.56%  |

**Stop codon gain**

|                                                                  |          |        |
|------------------------------------------------------------------|----------|--------|
| Bladder Urothelial Carcinoma                                     | 38 / 140 | 27.14% |
| Glioblastoma multiforme                                          | 16 / 79  | 20.25% |
| Skin Cutaneous Melanoma                                          | 9 / 45   | 20.00% |
| Uterine Carcinosarcoma                                           | 3 / 16   | 18.75% |
| Uterine Corpus Endometrial Carcinoma                             | 18 / 104 | 17.31% |
| Lung adenocarcinoma                                              | 13 / 79  | 16.46% |
| Lung squamous cell carcinoma                                     | 13 / 95  | 13.68% |
| Cervical squamous cell carcinoma and endocervical adenocarcinoma | 8 / 71   | 11.27% |
| Sarcoma                                                          | 9 / 96   | 9.38%  |
| Esophageal carcinoma                                             | 2 / 23   | 8.70%  |
| Breast invasive carcinoma                                        | 11 / 161 | 6.83%  |
| Head and Neck squamous cell carcinoma                            | 5 / 76   | 6.58%  |

---
