# Supplementary material
Source: PubMed Central journal article supplement (PMC9149100)
Supplement: NIHMS1793262-supplement-Supplementary_Table_S2.pdf [file NIHMS1793262-supplement-Supplementary_Table_S2.pdf]

**Supplementary Table S2.** *Clinical trials evaluating treatment with CDK4/6 inhibitors in combination with other pharmacologic agents.* Only trials including one of the currently approved CDK4/6 inhibitors (palbociclib, abemaciclib, ribociclib and trilaciclib) are included. All data were compiled from ClinicalTrials.gov in August 2021.

| Combination drug(s)                        | Tumor type                                                         | Clinical development |
|--------------------------------------------|--------------------------------------------------------------------|----------------------|
| <b>AKT inhibitors</b>                      |                                                                    |                      |
| Capivasertib (AZD5363) + Endocrine therapy | HR+/HER2- breast cancer                                            | Phase III            |
| Ipatasertib + Endocrine therapy            | HR+/HER2- breast cancer                                            | Phases I, II and III |
| <b>ALK inhibitors</b>                      |                                                                    |                      |
| Ceritinib                                  | ALK+ neuroblastoma<br>ALK+ NSCLC                                   | Phase I              |
| <b>Androgen-directed therapy</b>           |                                                                    |                      |
| Abiraterone + prednisolone                 | Advanced cancers<br>Castration-resistant prostate cancer           | Phases I and I/II    |
| Bicalutamide                               | AR+ breast cancer<br>AR+ TNBC                                      | Phase I/II           |
| Enzalutamide                               | RB+ castration-resistant prostate cancer                           | Phase I/II           |
| Bicalutamide + Goserelin + Leuprolide      | RB+ hormone-sensitive prostate cancer                              | Phase II             |
| <b>BCL2 inhibitors</b>                     |                                                                    |                      |
| APG-2575                                   | HR+/HER2- breast cancer                                            | Phase I/II           |
| Venetoclax + Endocrine therapy             | BCL2+ HR+ breast cancer                                            | Phase I              |
| <b>BCR-ABL/SRC inhibitors</b>              |                                                                    |                      |
| Bosutinib + Endocrine therapy              | HR+/HER2- breast cancer                                            | Phase I              |
| <b>BRAF inhibitors</b>                     |                                                                    |                      |
| LGX818                                     | BRAF-mutant melanoma<br>KRAS- or BRAF-mutant NSCLC                 | Phase I/II           |
| LXH254                                     | NRAS-mutant melanoma<br>Melanoma                                   | Phases I and II      |
| Sorafenib                                  | Refractory leukemia                                                | Phase I              |
| <b>BTK inhibitors</b>                      |                                                                    |                      |
| Ibrutinib                                  | Mantle cell lymphoma                                               | Phase II             |
| <b>CDK2 inhibitors</b>                     |                                                                    |                      |
| PF-07104091 +/- Endocrine therapy          | SCLC<br>NSCLC<br>Ovarian cancer<br>TNBC<br>HR+/HER2- breast cancer | Phase II             |
| <b>Chemotherapy</b>                        |                                                                    |                      |
| Capecitabine                               | HER2- breast cancer                                                | Phase I              |
| Carboplatin                                | HNSCC<br>Solid tumors                                              | Phases I and II      |
| Cisplatin                                  | Solid tumors<br>p16INK-altered HPV- HNSCC                          | Phases I and II      |
| CPX-351                                    | Acute myeloid leukemia                                             | Phase I/II           |
| Decitabine                                 | Refractory leukemia                                                | Phase I              |
| Docetaxel                                  | NSCLC                                                              | Phase II             |
| Docetaxel + Prednisone                     | Castration-resistant prostate cancer                               | Phase I/II           |

|                                                                                                           |                                              |                       |
|-----------------------------------------------------------------------------------------------------------|----------------------------------------------|-----------------------|
| Doxorubicin                                                                                               | Soft tissue sarcoma                          | Phase I               |
| Gemcitabine                                                                                               | Solid tumors                                 | Phase I               |
|                                                                                                           | Lymphoma                                     |                       |
|                                                                                                           | NSCLC                                        |                       |
| Nab-paclitaxel                                                                                            | Pancreatic ductal adenocarcinoma             | Phase I               |
|                                                                                                           | HR+/HER2- breast cancer                      |                       |
| Paclitaxel +/- Endocrine therapy                                                                          | Breast cancer                                | Phases I, I/II and II |
|                                                                                                           | Solid tumors                                 |                       |
| Pemetrexed                                                                                                | NSCLC                                        | Phase I               |
| Topotecan                                                                                                 | SCLC                                         | Phase I/II            |
| 5-FU + oxaliplatin                                                                                        | Solid tumors                                 | Phase I               |
| <b>Combination chemotherapy regimens</b>                                                                  |                                              |                       |
| Carboplatin + etoposide/topotecan                                                                         | SCLC                                         | Phases I/II and III   |
| Cytarabine, doxorubicin, prednisone/prednisolone, vincristine, pegaspargase, methotrexate, hydrocortisone | Pediatric acute lymphoblastic leukemia       | Phase I               |
|                                                                                                           | Pediatric lymphoblastic lymphoma             |                       |
| Epirubicin + cyclophosphamide + paclitaxel                                                                | TNBC                                         | N.A.                  |
| Gemcitabine + carboplatin                                                                                 | TNBC                                         | Phases II and III     |
| Irinotecan + temozolomide                                                                                 | Pediatric/young adult solid tumors           | Phase I               |
| Topotecan + cyclophosphamide                                                                              | Pediatric/young adult solid tumors           | Phase I               |
| Paclitaxel + carboplatin                                                                                  | Ovarian cancer                               | Phase I               |
|                                                                                                           | Fallopian tube<br>Peritoneal cancer          |                       |
| Topotecan + temozolomide                                                                                  | Pediatric/young adult recurrent malignancies | Phase I/II            |
| <b>EGFR inhibitors</b>                                                                                    |                                              |                       |
| Cetuximab                                                                                                 | CDKN2A-altered/HPV- HNSCC                    | Phases II and III     |
|                                                                                                           | HNSCC                                        |                       |
|                                                                                                           | CRC                                          |                       |
| Nazartinib (EGF816)                                                                                       | EGFR-mutant NSCLC                            | Phase I               |
| Necitumumab                                                                                               | NSCLC                                        | Phase I               |
| Osimertinib                                                                                               | EGFR-mutant NSCLC                            | Phase II              |
| <b>ERK1/2 inhibitors</b>                                                                                  |                                              |                       |
| LY3214996                                                                                                 | Solid tumors                                 | Phases I and II       |
|                                                                                                           | GBM                                          |                       |
| Ulixertinib (BVD-523)                                                                                     | Pancreatic cancer                            | Phase I               |
|                                                                                                           | Solid tumors                                 |                       |
| <b>FGFR inhibitors</b>                                                                                    |                                              |                       |
| Erdafitinib + Endocrine therapy                                                                           | HR+/HER2- FGFR+ breast cancer                | Phase I               |
| Rogaratinib (BAY1163877) + Endocrine therapy                                                              | HR+/HER2- FGFR+ breast cancer                | Phase I               |
| <b>Glucocorticoids</b>                                                                                    |                                              |                       |
| Dexamethasone                                                                                             | B-cell acute lymphoblastic leukemia          | Phase I               |
|                                                                                                           | Refractory leukemia                          |                       |
| <b>HAT inhibitors</b>                                                                                     |                                              |                       |
| PF-07248144                                                                                               | Solid tumors                                 | Phase I               |
| <b>HDAC inhibitors</b>                                                                                    |                                              |                       |
| Abexinostat + Endocrine therapy                                                                           | HR+ breast cancer                            | Phase I               |
|                                                                                                           | Gynecologic cancers                          |                       |

|                                                              |                                                                                    |                            |
|--------------------------------------------------------------|------------------------------------------------------------------------------------|----------------------------|
| Belinostat                                                   | TNBC<br>Ovarian cancer                                                             | Phase I                    |
| <b>Hedgehog pathway inhibitors</b>                           |                                                                                    |                            |
| Sonidegib                                                    | Pediatric/young adult brain tumors                                                 | Phase I                    |
| <b>HER2-targeted therapies</b>                               |                                                                                    |                            |
| Neratinib                                                    | Solid tumors with HER family alterations or<br>KRAS mutation                       | Phase I                    |
| Trastuzumab +/- pertuzumab +/- Endocrine therapy             | HER2+ breast cancer<br>HR+/HER2+ breast cancer                                     | Phases I, I/II, II and III |
| Trastuzumab + lapatinib + Endocrine therapy                  | HR+/HER2+ breast cancer brain metastases                                           | Phase II                   |
| Trastuzumab + Pyrotinib + Endocrine therapy                  | HR+/HER2- breast cancer                                                            | Phase II                   |
| Tucatinib + Endocrine therapy +/- trastuzumab                | HR+/HER2+ breast cancer                                                            | Phases I and I/II          |
| T-DM1 +/- Endocrine therapy                                  | HER2+ breast cancer<br>HR+/HER2+ breast cancer                                     | Phases I, I/II and II      |
| KN026 + Endocrine therapy                                    | HER2+ breast cancer                                                                | Phase I/II                 |
| PF-06804103 + Endocrine therapy                              | HER2+ breast cancer<br>Gastric cancer                                              | Phase I                    |
| <b>HIF-2<math>\alpha</math> inhibitors</b>                   |                                                                                    |                            |
| MK-6482                                                      | Clear-cell renal cell carcinoma                                                    | Phase I                    |
| <b>Hormone therapy</b>                                       |                                                                                    |                            |
| Endocrine therapy                                            | HR+/HER2- breast cancer                                                            | FDA-approved               |
| Endocrine therapy                                            | Ovarian cancer<br>Endometrial cancer<br>Fallopian tube cancer<br>Peritoneal cancer | Phases I and II            |
| <b>IGF1R inhibitors</b>                                      |                                                                                    |                            |
| Ganitumab                                                    | Ewig sarcoma                                                                       | Phase II                   |
| <b>IGF1/2 inhibitors</b>                                     |                                                                                    |                            |
| Xentuzumab +/- Endocrine therapy                             | Lung cancer<br>HR+/HER2- breast cancer                                             | Phase I                    |
| <b>Immune checkpoint inhibitors (PD-1 or PD-L1 blockers)</b> |                                                                                    |                            |
| Atezolizumab                                                 | Castration-resistant prostate cancer<br>Solid tumors                               | Phase II                   |
| Atezolizumab + Endocrine therapy                             | HR+/HER2- breast cancer                                                            | Phase I/II                 |
| Avelumab +/- Endocrine therapy                               | HR+ breast cancer<br>AR+ breast cancer                                             | Phases I and II            |
| Durvalumab + Endocrine therapy                               | HR+ breast cancer                                                                  | Phase I                    |
| INCMGA00012                                                  | Liposarcoma                                                                        | Phase II                   |
| LY3300054                                                    | Solid tumors                                                                       | Phase I                    |
| Nivolumab +/- Endocrine therapy                              | HPV- HNSCC<br>HNSCC<br>Hepatocellular carcinoma<br>HR+/HER2- breast cancer         | Phases I/II and II         |
| Pembrolizumab +/- Endocrine therapy                          | Gastroesophageal adenocarcinoma<br>HNSCC<br>NSCLC<br>HR+/HER2- breast cancer       | Phases I and II            |

|                                                             |                                                                                                                                                                                                         |                       |
|-------------------------------------------------------------|---------------------------------------------------------------------------------------------------------------------------------------------------------------------------------------------------------|-----------------------|
| Spartalizumab (PDR001) +/- Endocrine therapy                | HNSCC<br>Melanoma<br>Ovarian cancer<br>HR+ breast cancer                                                                                                                                                | Phases I and II       |
| <b>JAK1/2 inhibitors</b>                                    |                                                                                                                                                                                                         |                       |
| Ruxolitinib                                                 | Myelofibrosis                                                                                                                                                                                           | Phase I               |
| <b>KRAS G12C inhibitors</b>                                 |                                                                                                                                                                                                         |                       |
| LY3537982                                                   | Solid tumors                                                                                                                                                                                            | Phase I               |
| Sotorasib                                                   | Solid tumors                                                                                                                                                                                            | Phase I               |
| <b>MDM2 inhibitors</b>                                      |                                                                                                                                                                                                         |                       |
| HDM201                                                      | Advanced solid tumors<br>Liposarcoma                                                                                                                                                                    | Phases I and II       |
| <b>MEK inhibitors</b>                                       |                                                                                                                                                                                                         |                       |
| Binimetinib                                                 | KRAS-mutant NSCLC<br>KRAS/NRAS-mutant CRC<br>Pancreatic cancer<br>TNBC                                                                                                                                  | Phases I, I/II and II |
| MEK162                                                      | NRAS-mutant melanoma                                                                                                                                                                                    | Phase I/II            |
| PD-0325901                                                  | KRAS-mutant NSCLC<br>KRAS-mutant solid tumors                                                                                                                                                           | Phase I/II            |
| Trametinib                                                  | Solid tumors<br>Melanoma<br>Pediatric/young adult brain tumors                                                                                                                                          | Phases I and II       |
| <b>Metabolic modulators</b>                                 |                                                                                                                                                                                                         |                       |
| Hydroxychloroquine +/- Endocrine therapy                    | HR+ breast cancer<br>Breast cancer                                                                                                                                                                      | Phases I, I/II and II |
| Talaglenestat                                               | Solid tumors                                                                                                                                                                                            | Phase I/II            |
| <b>mTOR inhibitors</b>                                      |                                                                                                                                                                                                         |                       |
| Everolimus (RAD001) +/- Endocrine therapy                   | Pediatric diffuse pontine glioma<br>High-grade glioma<br>Pancreatic cancer<br>GBM<br>Neuroendocrine tumors<br>Brain tumors<br>Dedifferentiated liposarcoma<br>Leiomyosarcoma<br>HR+/HER2- breast cancer | Phases I, I/II and II |
| <b>Multi-RTK inhibitors</b>                                 |                                                                                                                                                                                                         |                       |
| Sunitinib                                                   | Renal cell carcinoma                                                                                                                                                                                    | Phase I               |
| <b>Multiple drug combinations</b>                           |                                                                                                                                                                                                         |                       |
| Atezolizumab + Entinostat + Ipatasertib + Endocrine therapy | HR+/HER2- breast cancer                                                                                                                                                                                 | Phase I/II            |
| Avelumab + Cetuximab                                        | HNSCC                                                                                                                                                                                                   | Phase I               |
| Binimetinib + Encorafenib                                   | BRAF-mutant melanoma                                                                                                                                                                                    | Phase I/II            |
| Cetuximab + LY3214996                                       | CRC                                                                                                                                                                                                     | Phase I/II            |
| Dexamethasone +/- everolimus                                | Acute lymphoblastic leukemia                                                                                                                                                                            | Phase I               |
| Etoposide/Carboplatin + Atezolizumab                        | SCLC                                                                                                                                                                                                    | Phase II              |
| Inavolisib (GDC-0077) +/- Endocrine therapy +/- Metformin   | PIK3CA-mutant solid tumors                                                                                                                                                                              | Phase I               |

|                                                                    |                                                                                          |                    |
|--------------------------------------------------------------------|------------------------------------------------------------------------------------------|--------------------|
| LGX818 + MEK162                                                    | BRAF-mutant melanoma<br>BRAF-mutant solid tumors                                         | Phases I/II and II |
| GnRH agonist + Endocrine therapy + Talazoparib +/-<br>Atezolizumab | Homologous recombination-deficient<br>HR+/HER2- breast cancer                            | Phase II           |
| Platinum-based chemotherapy + Avelumab                             | Bladder cancer                                                                           | Phase II           |
| Ruxolitinib + PIM447                                               | Myelofibrosis                                                                            | Phase I            |
| <b>NOTCH inhibitors</b>                                            |                                                                                          |                    |
| Crenigacestat (LY3039478)                                          | Solid tumors                                                                             | Phase I            |
| <b>PARP inhibitors</b>                                             |                                                                                          |                    |
| Niraparib                                                          | HR+/HER2- breast cancer                                                                  | Phase I            |
| Olaparib                                                           | Ovarian cancer                                                                           | Phase I            |
| Olaparib + Endocrine therapy                                       | BRCA-mutant HR+/HER2- breast cancer                                                      | Phase I            |
| Talazoparib                                                        | Solid tumors                                                                             | Phase I            |
| <b>PI3K inhibitors</b>                                             |                                                                                          |                    |
| Alpelisib (BYL719) + Endocrine therapy                             | HR+/HER2- breast cancer                                                                  | Phases I and I/II  |
| Buparlisib (BKM120) + Endocrine therapy                            | HR+/HER2- breast cancer                                                                  | Phase I            |
| Copanlisib (BAY 80-6946) + Endocrine therapy                       | HR+/HER2- breast cancer                                                                  | Phase I/II         |
| CYH33 + Endocrine therapy                                          | HR+/HER2- PIK3CA-mutant breast cancer                                                    | Phase I            |
| Inavolisib (GDC-0077) + Endocrine therapy                          | HR+/HER2- PIK3CA-mutant breast cancer                                                    | Phase II/III       |
| Pictilisib +/- Endocrine therapy                                   | HR+/HER2- PIK3CA-mutant breast cancer<br>PIK3CA-mutant solid tumors                      | Phase I            |
| Taselisib +/- Endocrine therapy                                    | HR+/HER2- PIK3CA-mutant breast cancer<br>PIK3CA-mutant solid tumors                      | Phase I            |
| <b>PI3K/mTOR dual inhibitors</b>                                   |                                                                                          |                    |
| Gedatolisib (PF-05212384) +/- Endocrine therapy                    | Squamous cell lung cancer<br>HNSCC<br>Pancreatic cancer<br>Breast cancer<br>Solid tumors | Phase I            |
| LY3023414 +/- Endocrine therapy                                    | NSCLC<br>Pancreatic cancer<br>HR+ breast cancer                                          | Phases I and II    |
| <b>Proteasome inhibitors</b>                                       |                                                                                          |                    |
| Bortezomib                                                         | Mantle cell lymphoma                                                                     | Phase I            |
| Bortezomib + Dexamethasone                                         | Multiple myeloma                                                                         | Phase II           |
| <b>SHP2 inhibitors</b>                                             |                                                                                          |                    |
| TNO155                                                             | Solid tumors                                                                             | Phase I            |
| <b>VEGF inhibitors</b>                                             |                                                                                          |                    |
| Bevacizumab                                                        | GBM with <i>CDKN2A/B</i> loss or <i>CDK4/6</i><br>amplification                          | Phase I            |
| <b>VEGFR2 inhibitors</b>                                           |                                                                                          |                    |
| Ramucirumab                                                        | Esophageal/gastroesophageal junction cancer<br>NSCLC<br>Solid tumors                     | Phases I and I/II  |

AR, androgen receptor; BTK, Bruton's tyrosine kinase; CRC, colorectal cancer; EGFR, epidermal growth factor receptor; ERK1/2, extracellular signal-regulated protein kinase 1/2; FGFR, fibroblast growth factor receptor; GBM, glioblastoma multiforme; HAT, histone acetyltransferase; HDAC, histone deacetylase; HER2, human epidermal growth factor receptor 2; HIF-2 $\alpha$ , hypoxia-inducible factor-2 $\alpha$ ; HNSCC, head and neck

squamous cell carcinoma; HPV, human papillomavirus; HR, hormone receptor; IGF1/2, insulin-like growth factor 1/2; IGF1R, insulin-like growth factor 1 receptor; NSCLC, non-small cell lung cancer; PARP, poly (ADP-ribose) polymerase; RTK, receptor tyrosine kinase; SCLC, small cell lung cancer; SHP2, Src homology region 2 (SH2)-containing protein tyrosine phosphatase 2; TNBC, triple-negative breast cancer; VEGF, vascular endothelial growth factor; VEGFR2, vascular endothelial growth factor receptor 2.
